# Supplementary material
Source: PubMed Central journal article supplement (PMC5641247)
Supplement: NIHMS894048-supplement-1.pdf [file NIHMS894048-supplement-1.pdf]

## **Supplementary Information**

Supplementary Figures S1 to S8

Supplementary Tables 1 to 3

# Supplementary Figure 1

**A**

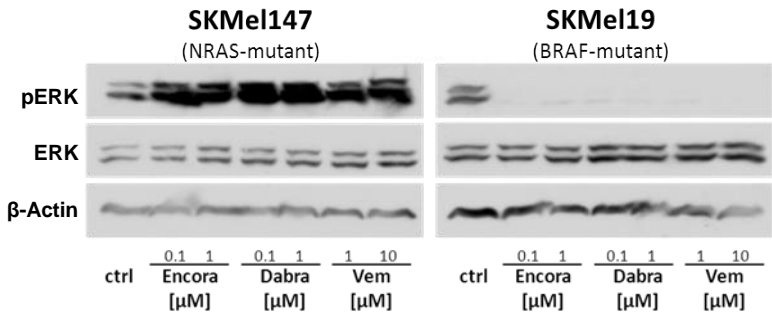

**B**

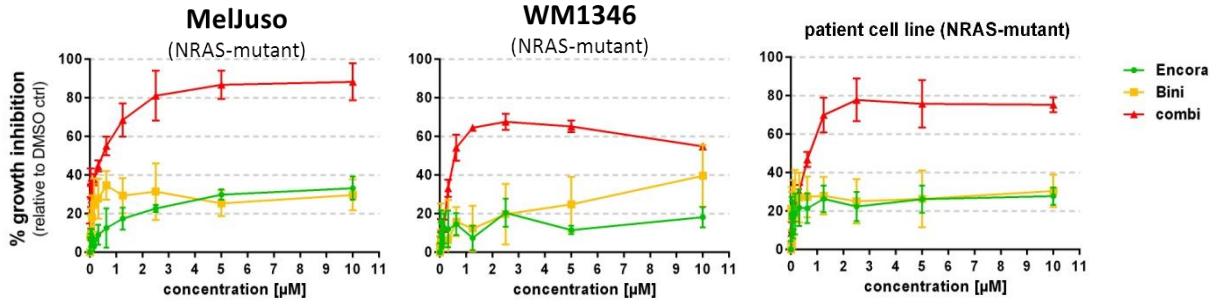

**C**

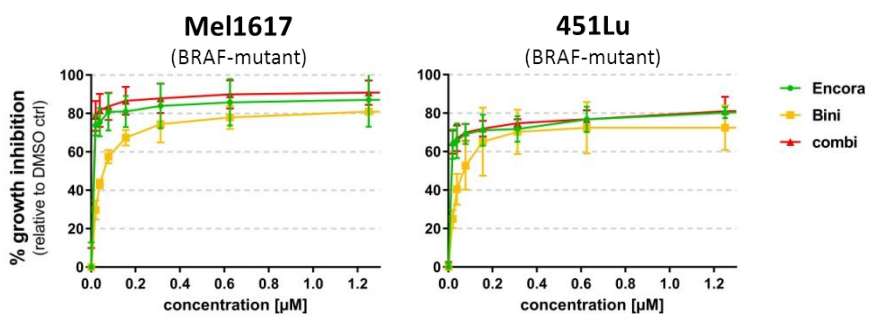

**D**

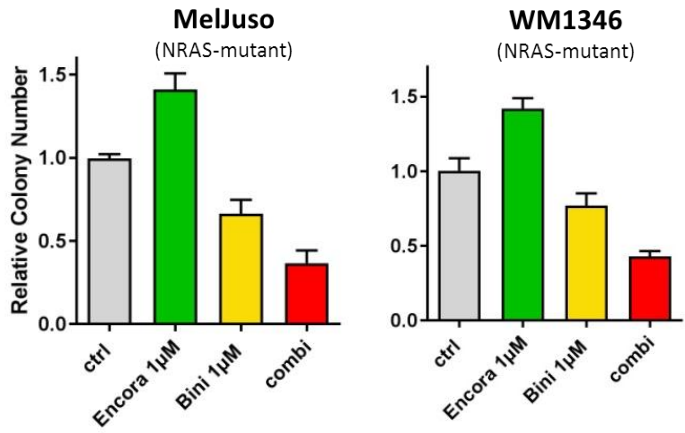

# Supplementary Figure 1

E

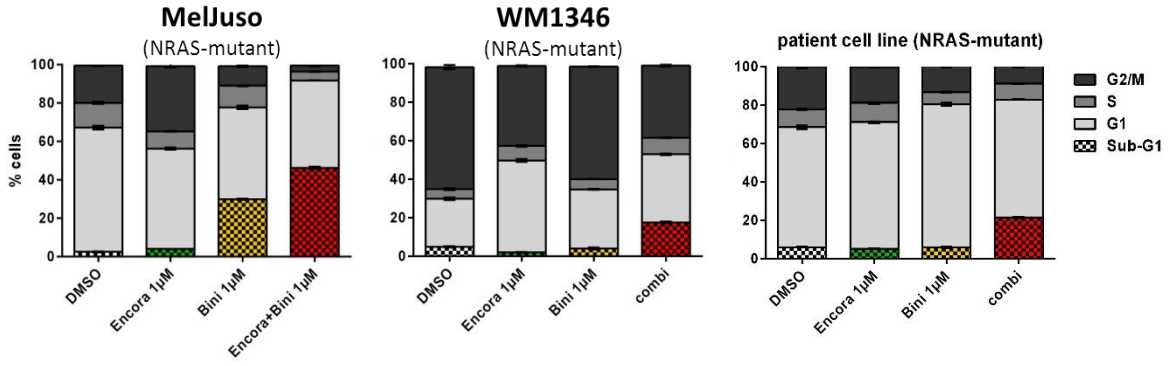

F

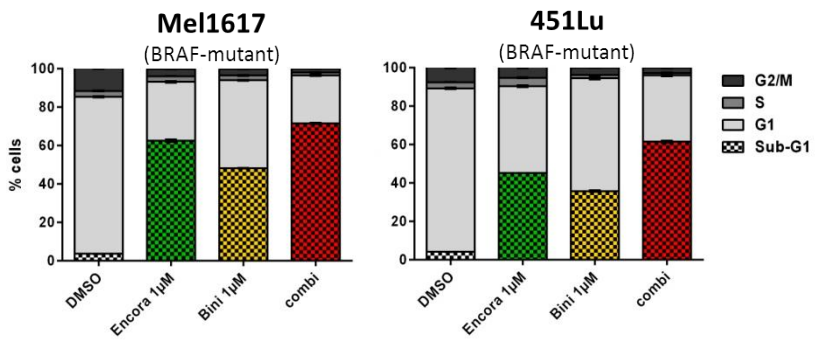

## Suppl. Figure 1

### **Encorafenib combined with binimetinib leads to increased growth inhibition and increased induction of apoptosis in NRAS-mutant melanoma cells**

(A) Whole cell lysates from melanoma cells with NRAS (SKMel147) or BRAF (SKMel19) mutation treated with encorafenib (0.1 and 1  $\mu$ M), dabrafenib (0.1 and 1  $\mu$ M) and vemurafenib (1 and 10  $\mu$ M) or DMSO (control) for 24 h were subjected to Western blot to detect pERK and ERK levels;  $\beta$ -Actin served as a loading control. Experiment shown is a representative of two independent experiments. (B;C) Growth assessment (4-methylumbelliferyl heptanoate of indicated NRAS-mutant (B) or BRAF-mutant (C) melanoma cells treated with encorafenib, binimetinib or both for 72 h. The percentage of growth inhibition was calculated, normalized to the DMSO-treated control. One representative experiment of two is shown (mean  $\pm$  SD of quadruplicates). (D) Anchorage-independent growth assays of NRAS-mutant cell lines treated with encorafenib, binimetinib or both for 10 d. Colonies were visualized with crystal violet, counted and normalized to the untreated control. One representative experiment of two is shown (mean  $\pm$  SD triplicates). (E;F) FACS cell cycle analysis (propidium iodide; right) of indicated NRAS-mutant (E) or BRAF-mutant (F) melanoma cells treated with encorafenib, binimetinib or both for 72 h. The size of the sub-G1 fraction was calculated from FACS cell cycle analysis using propidium iodide (mean  $\pm$  SD of duplicates from three independent experiments).

# Supplementary Figure 2

**A**

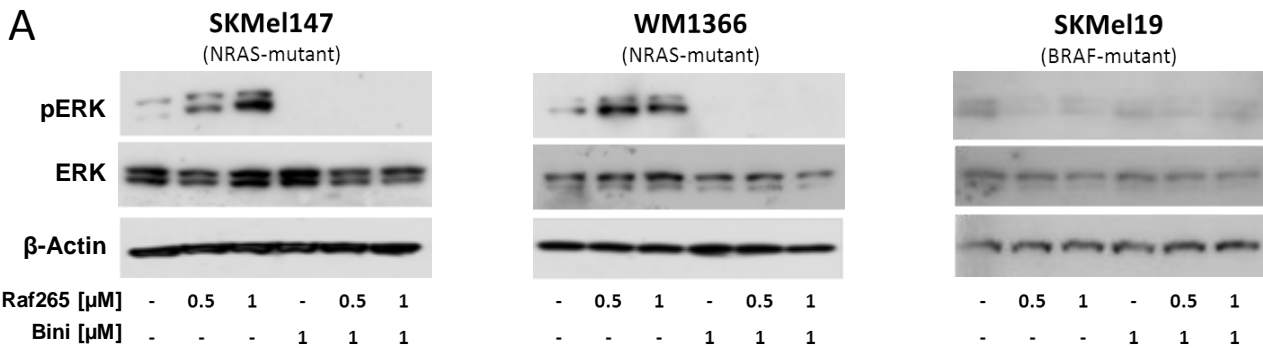

**B**

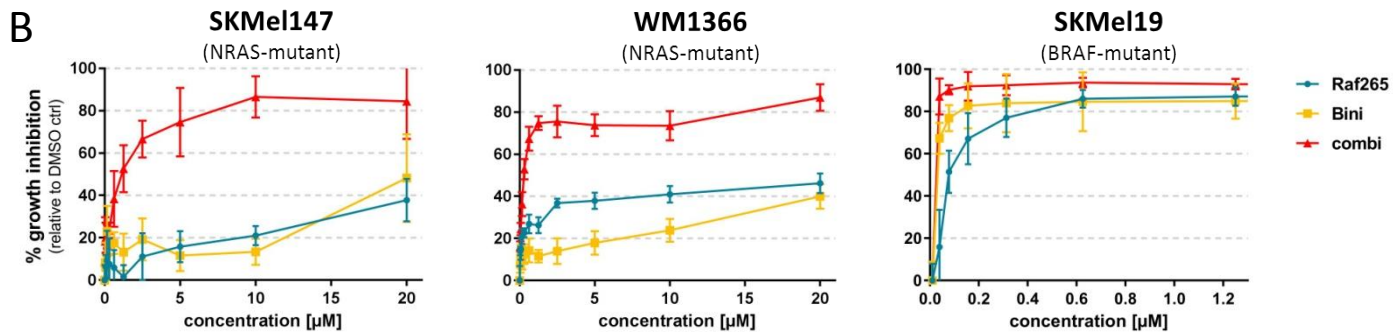

**C**

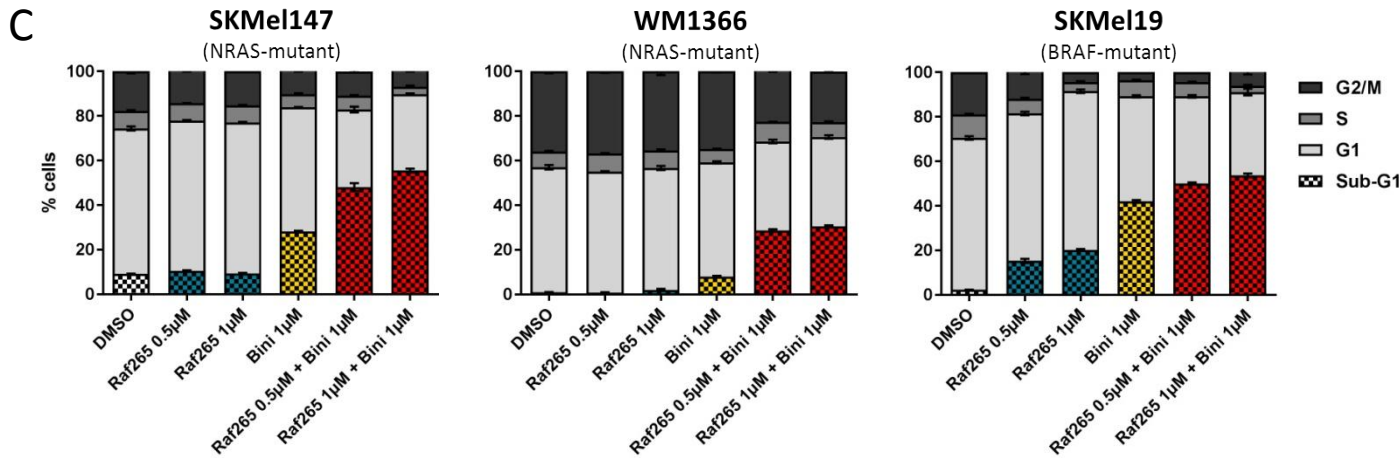

**D**

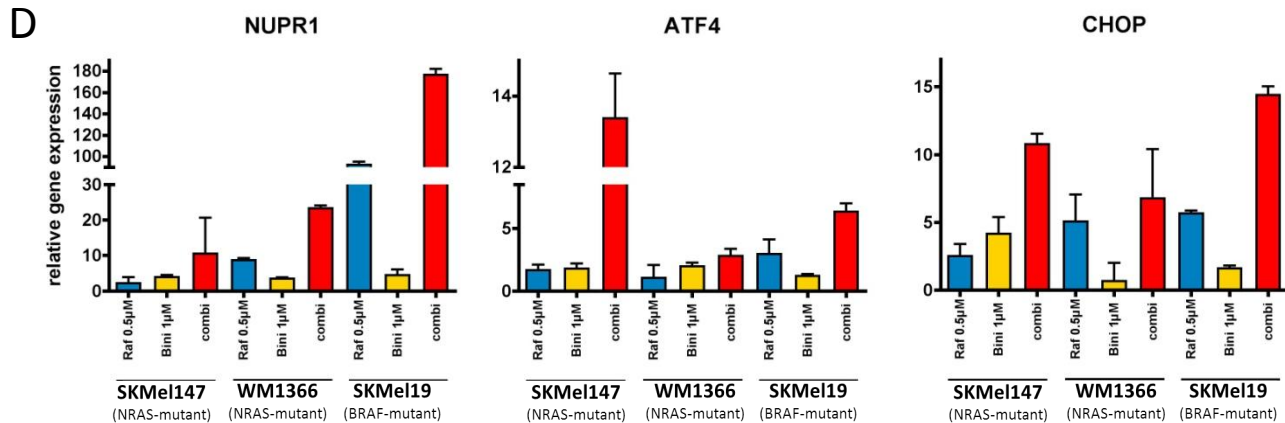

## Suppl. Figure 2

### The panRAF inhibitor Raf265 combined with binimetinib leads to growth inhibition, induction of apoptosis and ER stress genes in NRAS-mutant melanoma cells

(A) Whole cell lysates from NRAS-mutant (SKMel147, WM1366) or BRAF-mutant (SKMel19) melanoma cells treated with Raf265 or/and binimetinib or DMSO as a control for 24 h were subjected to Western blot analysis to detect pERK, ERK and  $\beta$ -Actin. Experiment shown is a representative of three independent experiments. (B) Growth assessment (4-methylumbelliferyl heptanoate (MUH)) of NRAS-mutant (SKMel147, WM1366) or BRAF-mutant (SKMel19) melanoma cells treated with Raf265, binimetinib (Bini), their combination or DMSO as control for 72 h. The percentage of growth inhibition was calculated, normalized to the DMSO-treated control. One representative experiment of two is shown (mean  $\pm$  SD of quadruplicates). (C) Melanoma cells were treated with Raf265, binimetinib, Raf265 plus binimetinib or DMSO as control for 72 h. Apoptotic cells (sub-G1 fraction) were quantified by FACS cell cycle analysis (propidium iodide staining) (mean  $\pm$  SD of duplicates from three independent experiments). (D) Melanoma cells were treated with Raf265 or/and binimetinib for 18 h. Real-time PCR results show levels of NUPR1, ATF4 and CHOP mRNA expression in comparison with DMSO treated cells. All samples were normalized to TBP mRNA (mean  $\pm$  SD of triplicates from three independent experiments).

# Supplementary Figure 3

**A**

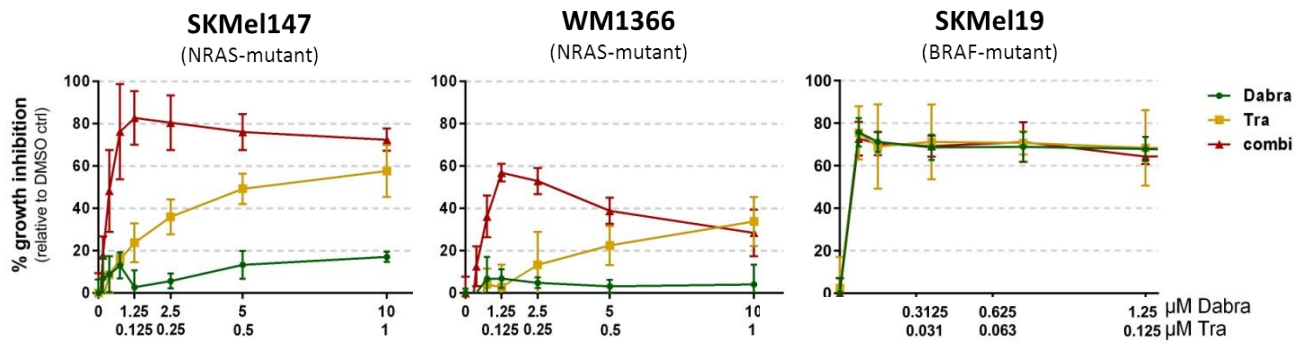

**B**

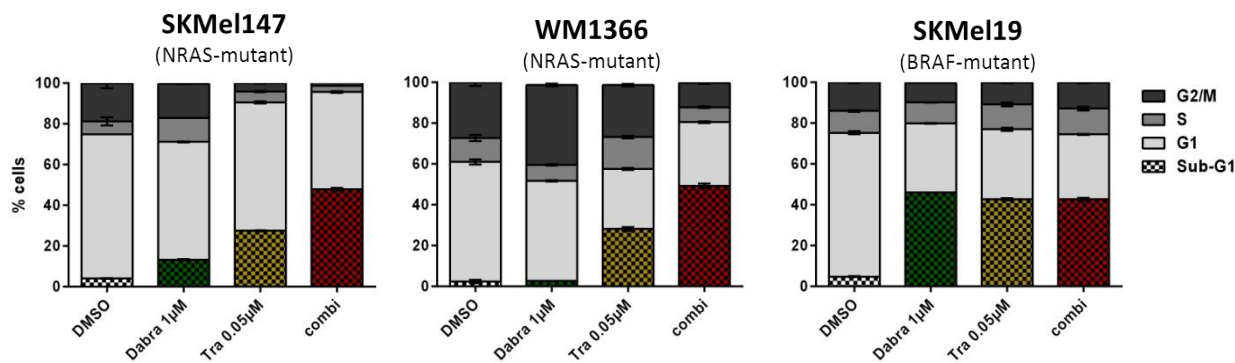

**C**

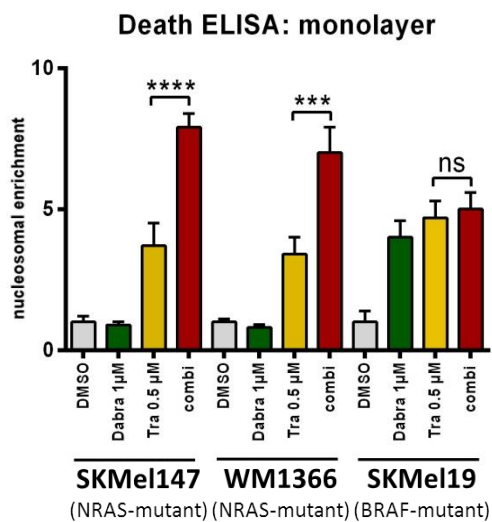

**D**

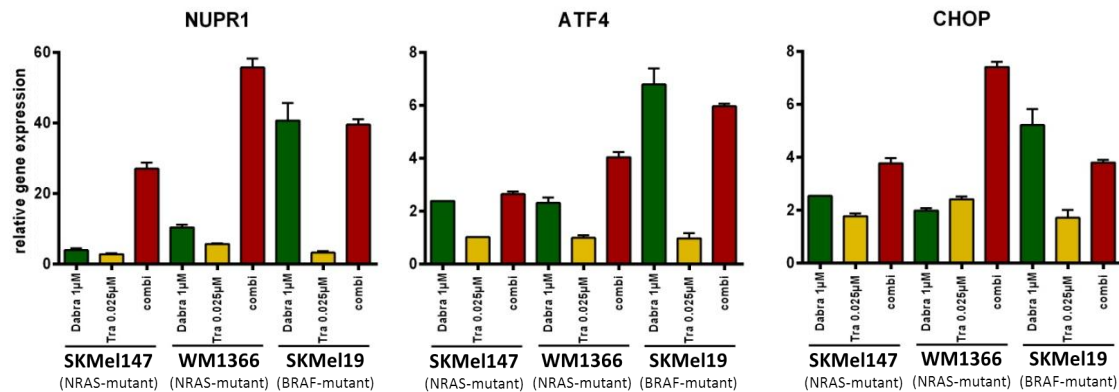

### Suppl. Figure 3

#### **Dabrafenib combined with trametinib leads to strong growth inhibition, induction of apoptosis and ER stress genes in NRAS-mutant melanoma cells**

(A) Growth assessment (4-methylumbelliferyl heptanoate (MUH)) of NRAS-mutant (SKMel147, WM1366) or BRAF-mutant (SKMel19) melanoma cells treated with dabrafenib (Dabra), trametinib (Tra), their combination or DMSO as control for 72 h. The percentage of growth inhibition was calculated, normalized to the DMSO-treated control. One representative experiment of two is shown (mean  $\pm$  SD of quadruplicates). (B) Melanoma cells were treated with dabrafenib, trametinib, dabrafenib plus trametinib or DMSO as control for 72 h. Apoptotic cells (sub-G1 fraction) were quantified by FACS cell cycle analysis (propidium iodide staining) (mean  $\pm$  SD of duplicates from three independent experiments). (C) Melanoma cells grown in monolayer were treated with dabrafenib or/and trametinib for 48 h. Nucleosomal enrichment in cytosolic fractions (apoptotic cell death) was calculated and displayed in a bar graph (mean  $\pm$  SD of triplicates from three independent experiments). (D) Melanoma cells were treated with dabrafenib or/and trametinib for 18 h. Real-time PCR results show levels of NUPR1, ATF4 and CHOP mRNA expression in comparison with DMSO treated cells. All samples were normalized to TBP mRNA (mean  $\pm$  SD of triplicates from three independent experiments).



# Supplementary Figure 4

**A**

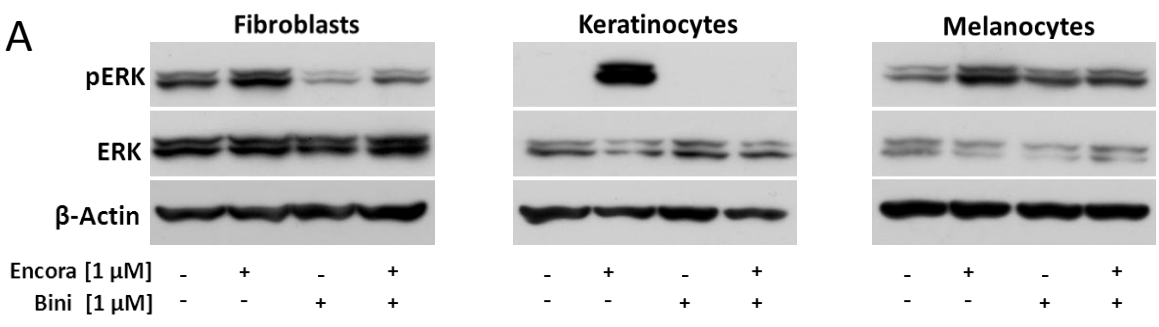

**B**

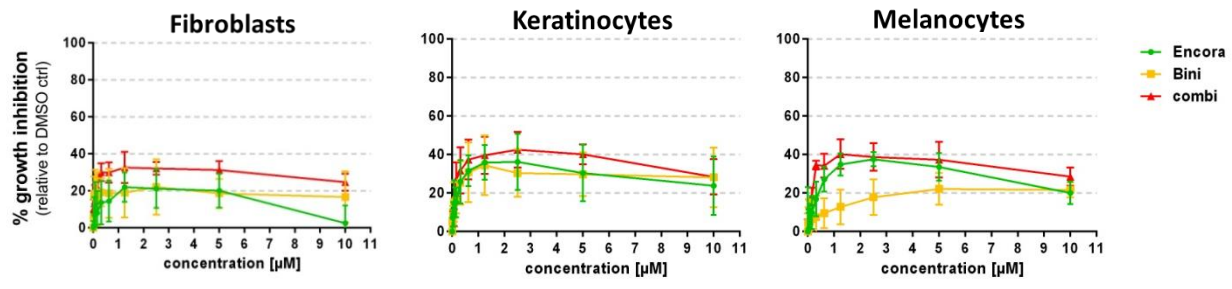

**C**

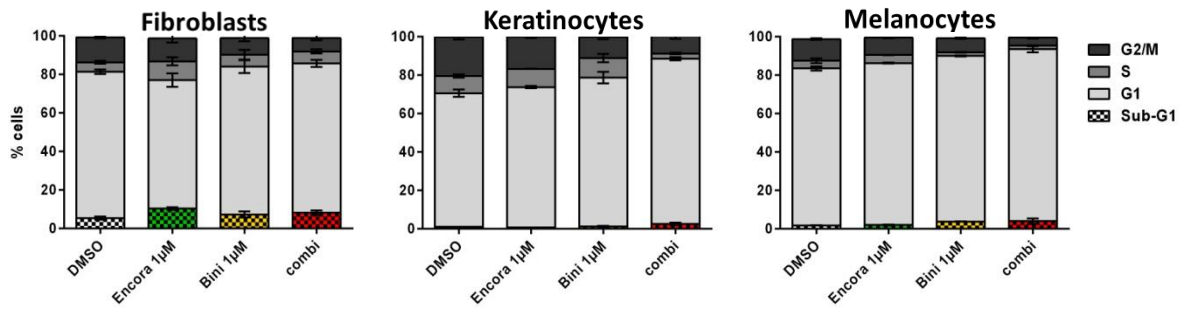

#### **Suppl. Figure 4**

#### **In normal skin cells encorafenib and binimetinib induce only weak growth inhibition and no significant levels of apoptosis**

Benign cells (Fibroblasts, keratinocytes, melanocytes) were treated with encorafenib, binimetinib, both and DMSO as control. (A) Western blot analysis of whole benign cell lysates was performed after 24 h of treatment with the indicated inhibitors or DMSO. pERK and ERK levels in comparison with  $\beta$ -Actin as loading control were determined. Experiment shown is a representative of two independent experiments. (B) Growth assessment (MUH; 4-methylumbelliferyl heptanoate) of indicated primary skin cells was measured after 72 h. The percentage of growth inhibition was calculated, normalized to the DMSO-treated control. One representative experiment of two is shown (mean  $\pm$  SD of quadruplicates). (C) FACS cell cycle analysis (propidium iodide) treated with the indicated substances for 72 h (cell cycle). The size of the fractions was calculated from FACS cell cycle analysis using propidium iodide (mean  $\pm$  SD of duplicates from three independent experiments).

# Supplementary Figure S5

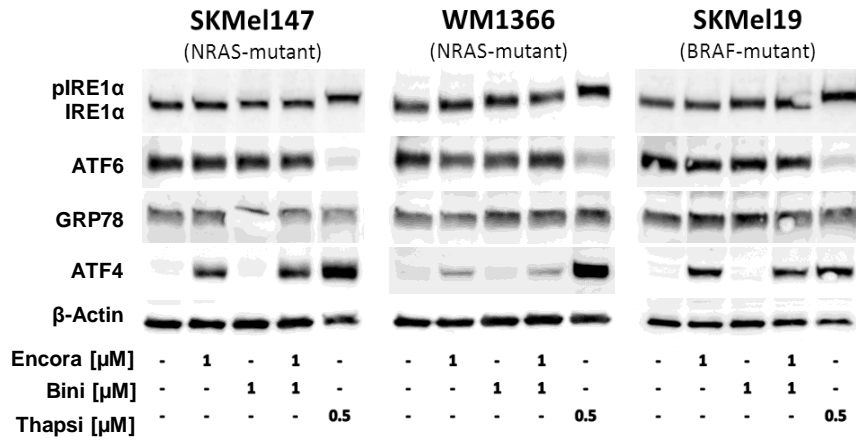

## Suppl. Figure 5

### **BRAF<sub>i</sub> combined with MEK<sub>i</sub> leads to an ER stress response involving the PERK pathway?**

Western blot analysis of whole cell lysates was performed after 4 h of treatment with the indicated inhibitors or DMSO. pIRE1 $\alpha$ , IRE1 $\alpha$ , ATF6, GRP78 and ATF4 levels in comparison with  $\beta$ -Actin as loading control were determined. Disappearance of the 90 kDa ATF6 band indicates ATF6 cleavage while a shift of the IRE1 $\alpha$  band indicates its phosphorylation. Experiment shown is a representative of three independent experiments.

# Supplementary Figure S6

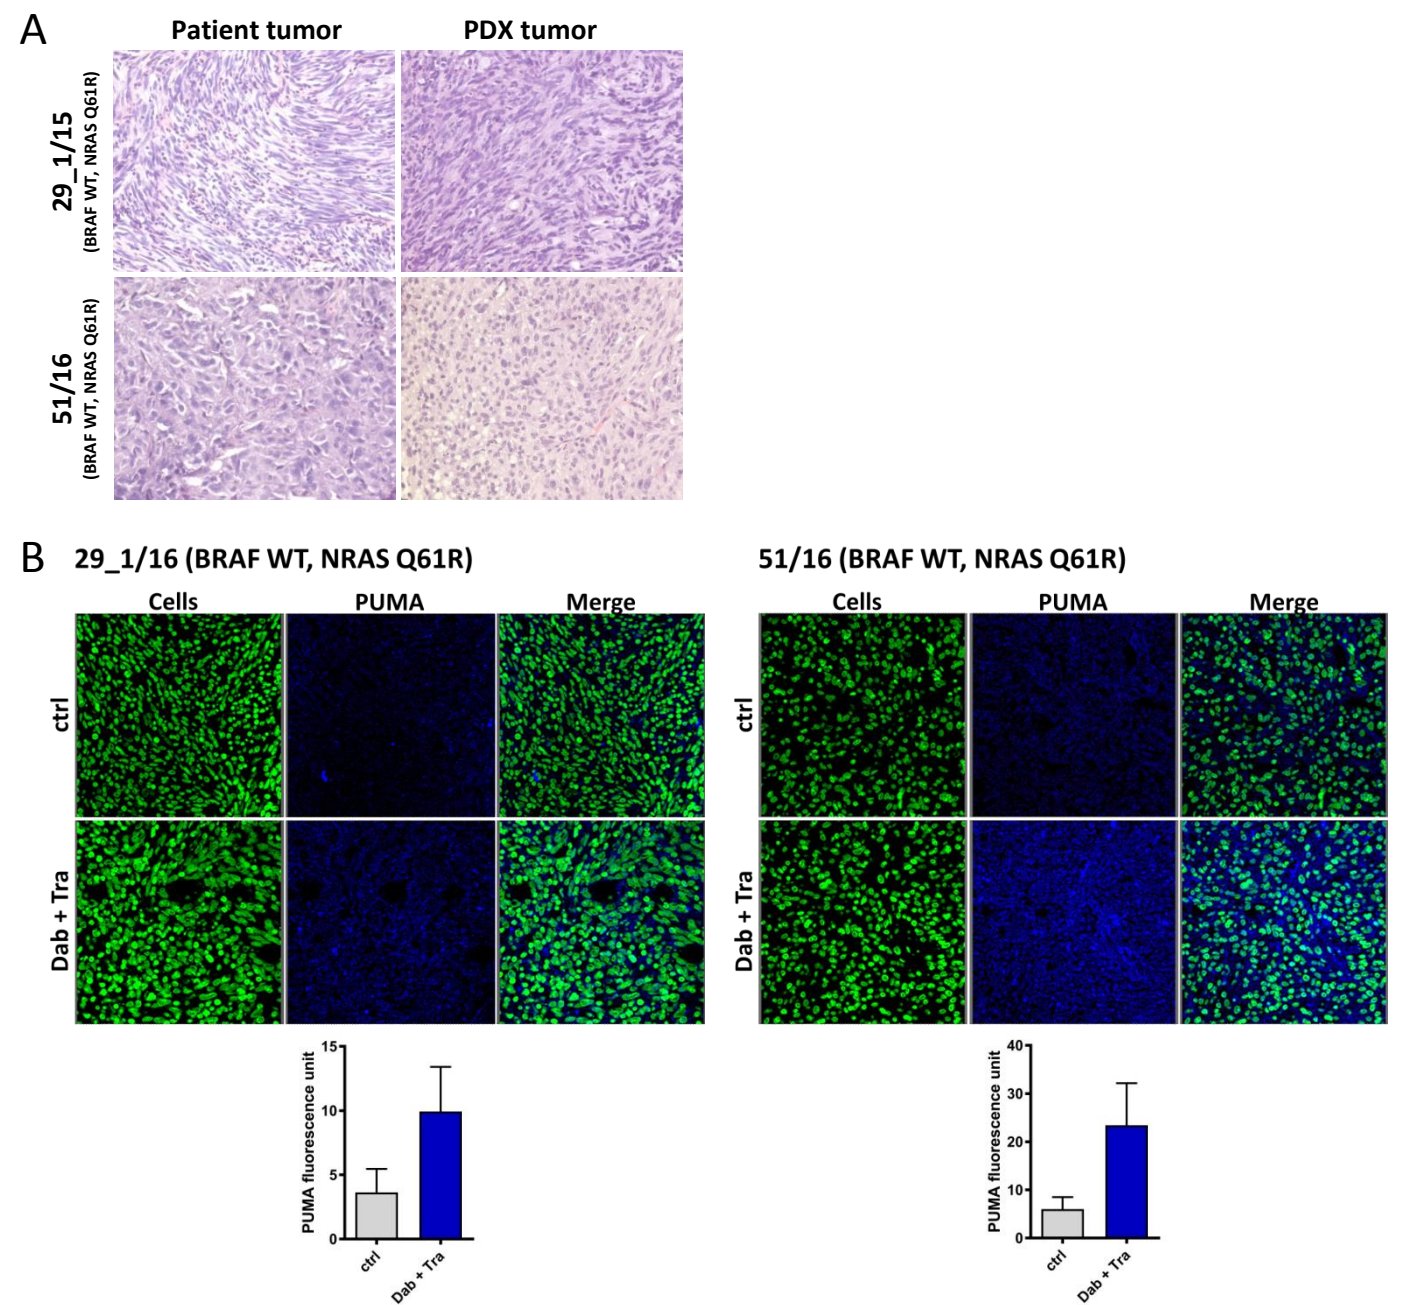

## Suppl. Figure 6

### **BRAF<sup>i</sup> combined with MEK<sup>i</sup> leads to activation of PUMA in patient-derived tumor slice cultures.**

(A) Tumor tissue from patients with NRAS-mutant melanoma and the corresponding PDX tumor were embedded in paraffin blocks and histologically analyzed by H&E staining. (B) Tumor tissue from patients with NRAS-mutant melanoma was expanded in a PDX model, sliced and then treated with the indicated inhibitor combinations. After 4 days the slices were stained with YOPRO (nuclei marker) or PUMA and analyzed by confocal microscopy. Images of one representative per treatment group are shown. Median Fluorescence intensities for PUMA were calculated and displayed in a bar graph (error bars represent SD of 4 random sites in each tumor per treatment group).

# Supplementary Figure S7

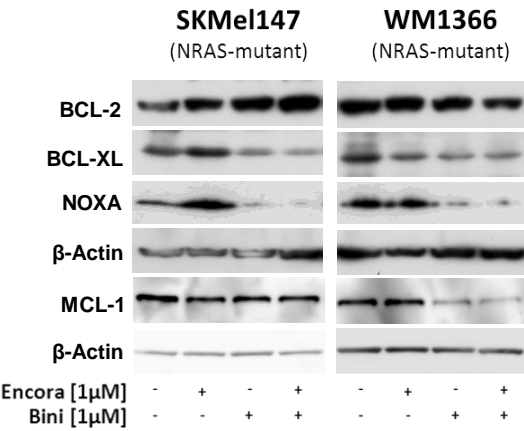

## Suppl. Figure 7

**Binimetinib and encorafenib induced apoptosis is partly mediated by the anti-apoptotic BCL-2 family members and by the pro-apoptotic BH3-only protein NOXA .**

Melanoma cells were treated with encorafenib or/and binimetinib or DMSO for 24 h. Western Blot analysis of whole cell lysates was performed to detect BCL-2, BCL-XL, NOXA and MCL-1 compared to  $\beta$ -Actin as a loading control. Experiment shown is a representative of three independent experiments.

# Supplementary Figure S8

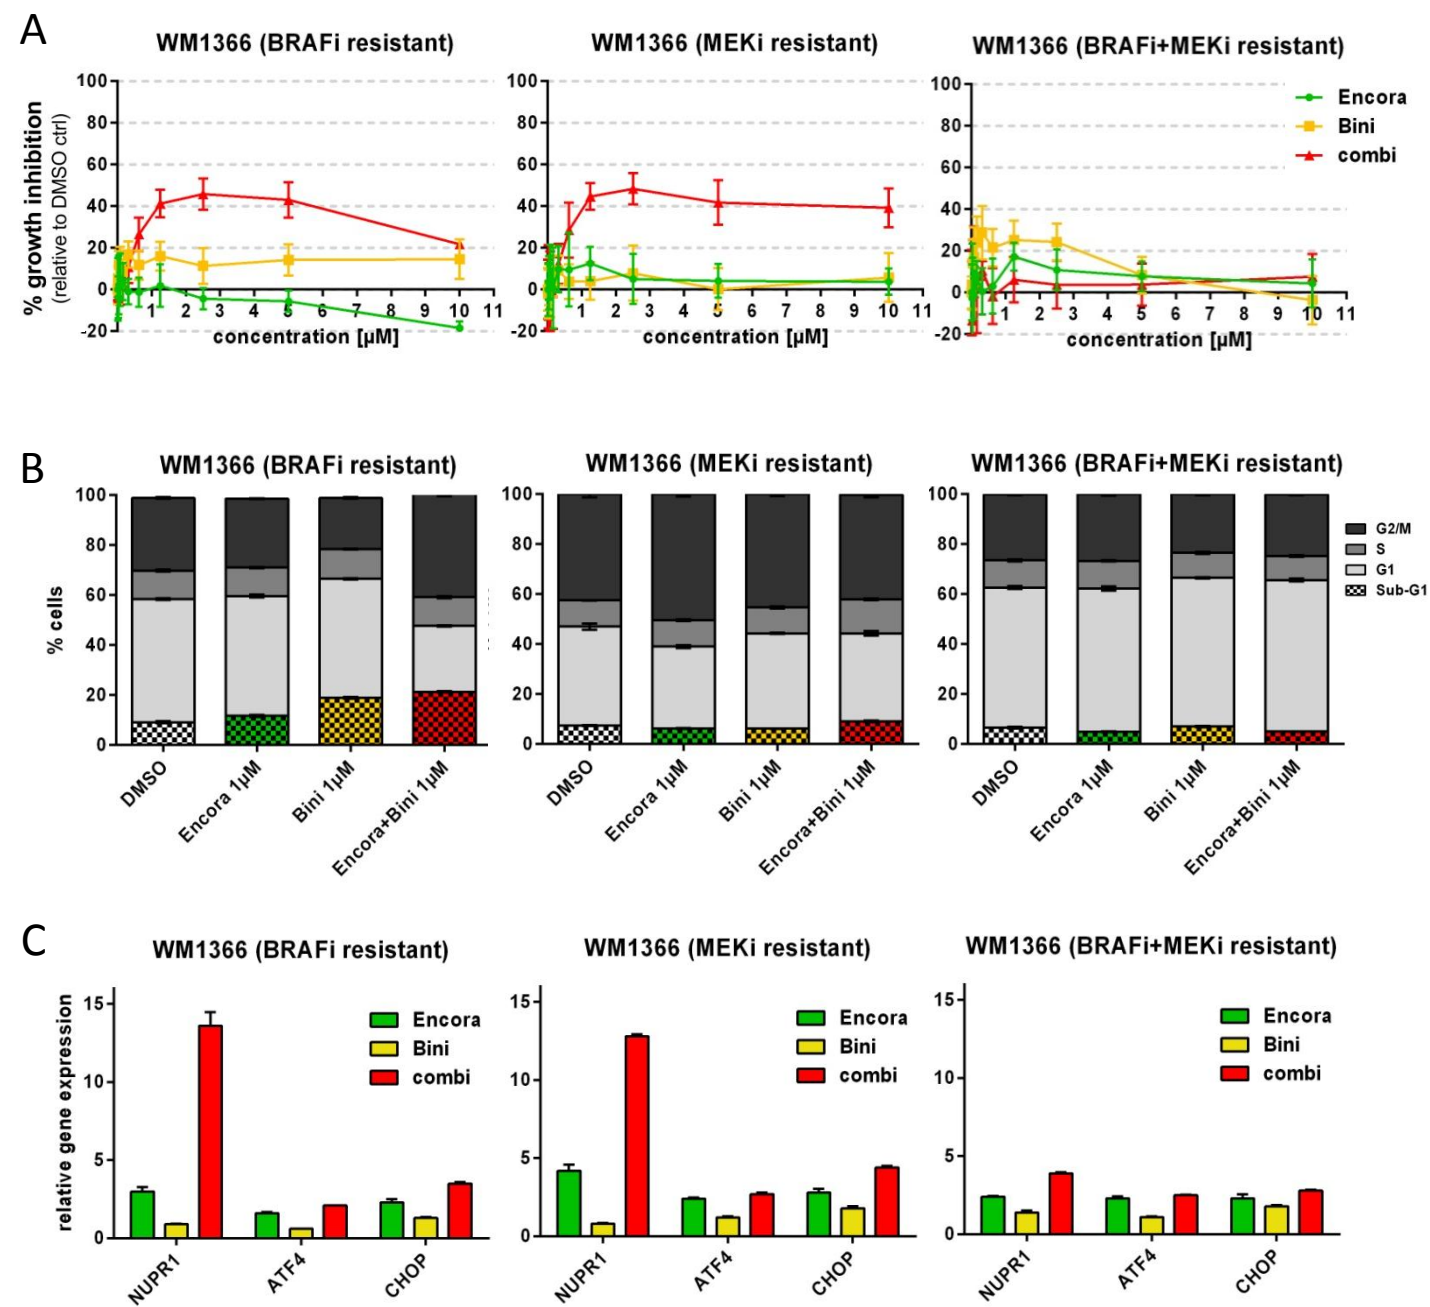

### **Suppl. Figure 8**

#### **NRAS mutated cells resistant to encorafenib, binimetinib or the combination of encorafenib and binimetinib.**

(A) Growth assessment (4-methylumbelliferyl heptanoate (MUH)) of melanoma cells (BRAFi resistant, MEKi resistant or BRAFi+MEKi resistant) treated with encorafenib (Encora), binimetinib (Bini), their combination or DMSO as control for 72 h. The percentage of growth inhibition was calculated, normalized to the DMSO-treated control. One representative experiment of two is shown (mean  $\pm$  SD of quadruplicates). (B) Melanoma cells were treated with encorafenib, binimetinib, encorafenib plus binimetinib or DMSO as control for 72 h. Apoptotic cells (sub-G1 fraction) were quantified by FACS cell cycle analysis (propidium iodide staining) (mean  $\pm$  SD of duplicates from three independent experiments). (C) Melanoma cells were treated with encorafenib (1  $\mu$ M), binimetinib (1  $\mu$ M) or both inhibitors for 18 h. Real-time PCR results show levels of NUPR1, ATF4 and CHOP mRNA expression in comparison with DMSO treated cells. All samples were normalized to TBP mRNA (mean  $\pm$  SD of triplicates from three independent experiments).

# Supplementary Table 1

|                                           |             |             |             |             |             |            |           |
|-------------------------------------------|-------------|-------------|-------------|-------------|-------------|------------|-----------|
| <b>Encora in <math>\mu\text{M}</math></b> | <b>0.16</b> | <b>0.32</b> | <b>0.63</b> | <b>1.25</b> | <b>2.5</b>  | <b>5</b>   | <b>10</b> |
| <b>Bini in <math>\mu\text{M}</math></b>   | <b>0.16</b> | <b>0.32</b> | <b>0.63</b> | <b>1.25</b> | <b>2.5</b>  | <b>5</b>   | <b>10</b> |
| SKMel147                                  | 0.78        | 0.03        | 0.01        | 0.01        | 0.02        | 0.05       | 0.17      |
| WM1366                                    | 0.05        | 0.04        | 0.06        | 0.09        | 0.14        | 0.3        | 0.63      |
| <b>Dabra in <math>\mu\text{M}</math></b>  | <b>0.16</b> | <b>0.32</b> | <b>0.63</b> | <b>1.25</b> | <b>2.5</b>  | <b>5</b>   | <b>10</b> |
| <b>Tra in <math>\mu\text{M}</math></b>    | <b>0.02</b> | <b>0.03</b> | <b>0.06</b> | <b>0.13</b> | <b>0.25</b> | <b>0.5</b> | <b>1</b>  |
| SKMel147                                  | 0.08        | 0.08        | 0.09        | 0.15        | 0.33        | 0.73       | 161.3     |
| WM1366                                    | 0.18        | 0.06        | 0.02        | 0.02        | 0.11        | 0.84       | 232.2     |

< 0.1 very strong  
 0.1 – 0.3 strong  
 0.3 – 0.7 moderate  
 0.7 – 0.85 slight  
 0.85 – 0.9 additive  
 > 0.9 antagonistic



## Supplementary Table 2

| Antibodies used for protein detection in Western Blot and Immunofluorescence |              |                                                     |
|------------------------------------------------------------------------------|--------------|-----------------------------------------------------|
| Protein                                                                      | Order No.    | Source                                              |
| pERK                                                                         | #9101        | Cell Signaling Technologies                         |
| ERK                                                                          | #9102        | Cell Signaling                                      |
| NUPR1                                                                        |              | Kindly provided by Juan Iovanna (INSERM, Marseille) |
| CHOP                                                                         | #5554        | Cell Signaling Technologies                         |
| ATF4                                                                         | #1371        | Abcam                                               |
| BIM                                                                          | #2933, #2819 | Cell Signaling Technologies                         |
| PUMA                                                                         | #4976        | Cell Signaling Technologies                         |
| BCL-2                                                                        | #2872        | Cell Signaling Technologies                         |
| BCL-XL                                                                       | #2762        | Cell Signaling Technologies                         |
| MCL-1                                                                        | #4572        | Cell Signaling Technologies                         |
| NOXA                                                                         | #14766       | Cell Signaling Technologies                         |
| GRP78                                                                        | #21685       | Abcam                                               |
| IRE1 $\alpha$                                                                | #3294        | Cell Signaling Technologies                         |
| ATF6                                                                         | #134561      | Cell Signaling Technologies                         |
| p $\ell$ F2 $\alpha$                                                         | #9721        | Cell Signaling Technologies                         |
| eIF2 $\alpha$                                                                | #9722        | Cell Signaling Technologies                         |
| Caspase 9/cl. Caspase9                                                       | #9502        | Cell Signaling Technologies                         |
| Caspase 3                                                                    | #9662        | Cell Signaling Technologies                         |
| cl. Caspase 3                                                                | #9664        | Cell Signaling Technologies                         |
| PARP/cl. PARP                                                                | #9542        | Cell Signaling Technologies                         |
| Ki67                                                                         | #M7240       | DAKO                                                |
| $\beta$ -Actin                                                               | #4967        | Cell Signaling Technologies                         |

## Supplementary Table 3

**Forward (fo) and reverse (re) primer sequences for quantitative real-time PCR**

|          |                              |
|----------|------------------------------|
| NUPR1_fo | 5'-CCATTCCTACCTCGGGCCTCTCATC |
| NUPR1_re | 5'-TCTTGGTGCGACCTTTCCGGC     |
| CHOP_fo  | 5'-AAGGCACTGAGCGTATCATGT     |
| CHOP_re  | 5'-TGAAGATACTTCCTTCTTGAACAC  |
| ATF4_fo  | 5'-TGGGGAAAGGGGAAGAGGTTGTAA  |
| ATF4_re  | 5'-AGTCGGGTTTGGGGGCTGAAG     |
| PUMA_fo  | 5'-GAAGAGCAAATGAGCCAAACG     |
| PUMA_re  | 5'-GGAGCAACCGGCAAACG         |
| TBP_fo   | 5'-TGCACAGGAGCCAAGAGTGAA     |
| TBP_re   | 5'-CACATCACAGCTCCCCACCA      |
